# Supplementary material
Source: publisher figshare collection journal article supplement (https://acs.figshare.com/ndownloader/files/22762277)
Supplement: Supplementary file 1 [file 22762277]

# Supporting Information

## Pd-Functionalized ZnO:Eu Columnar Films for Room Temperature Hydrogen Gas Sensing: A Combined Experimental and Computational Approach

Cristian Lupan,<sup>1,\*</sup> Rasoul Khaledialidusti,<sup>2</sup> Abhishek Kumar Mishra,<sup>3,\*</sup> Vasile Postica,<sup>1,†</sup>

Maik-Ivo Terasa,<sup>4</sup> Nicolae Magariu,<sup>1</sup> Thierry Pauporté,<sup>5,\*</sup> Bruno Viana,<sup>5</sup>

Jonas Drewes,<sup>6</sup> Alexander Vahl,<sup>6</sup> Franz Faupel,<sup>6</sup> Rainer Adelung<sup>4,\*</sup>

<sup>1</sup> Center for Nanotechnology and Nanosensors, Department of Microelectronics and Biomedical Engineering, Technical University of Moldova, 168, Stefan cel Mare Av., MD-2004, Chisinau, Republic of Moldova

<sup>2</sup> Department of Mechanical and Industrial Engineering, Norwegian University of Science and Technology (NTNU), 7491, Trondheim, Norway

<sup>3</sup> Department of Physics, School of Engineering, University of Petroleum & Energy Studies, Bidholi via Premnagar, Dehradun, 248007, India

<sup>4</sup> Functional Nanomaterials, Faculty of Engineering, Institute for Materials Science, Kiel University, Kaiserstr. 2, D-24143, Kiel, Germany

<sup>5</sup> PSL Université, Chimie ParisTech, CNRS, Institut de Recherche de Chimie Paris (IRCP), 11 rue P. et M. Curie, F, 75005 Paris, France

<sup>6</sup> Chair for Multicomponent Materials, Faculty of Engineering, Institute for Materials Science, Kiel University, Kaiserstr. 2, D-24143, Kiel, Germany

\* Corresponding authors:

Prof. Dr. Thierry Pauporté ( [thierry.pauporte@chimieparistech.psl.eu](mailto:thierry.pauporte@chimieparistech.psl.eu) )  
PSL University, CNRS, France

Prof. Dr. Rainer Adelung ( [ra@tf.uni-kiel.de](mailto:ra@tf.uni-kiel.de) )  
Kiel University, Germany

Prof. Dr. Abhishek K. Mishra ( [akmishra@ddn.upes.ac.in](mailto:akmishra@ddn.upes.ac.in) )  
University of Petroleum and Energy Studies, India

Cristian Lupan ( [cristian.lupan@mib.utm.md](mailto:cristian.lupan@mib.utm.md) )  
Technical University of Moldova, Republic of Moldova

## Supporting Information Text S1

The overview spectra corresponding to ZnO:Eu columnar thin films with increased Eu-doping concentration are shown in **Figure S1a**. For both spectra the presence of Zn, Eu, O and C is clearly observed and the direct comparison indicates that the signal corresponding to Eu is stronger for the ZnO:Eu(4) thin film (blue line, top) than the ZnO:Eu(2) thin film (red line, bottom). The signal corresponding to Zn, Eu and O is attributed to the thin film while the signal of C originates from surface adsorbates such as atmospheric carbohydrates. For a more detailed comparison of the two ZnO:Eu thin films, the C-1s, Eu-3d and Zn-2p lines are depicted in **Figure S1b**. The different level of doping reflects on the europium signal and accordingly the corresponding Eu-3d lines are more pronounced for the ZnO:Eu(4) thin film than for the ZnO:Eu(2) thin film. However, the peak position of the Eu-3d<sub>5/2</sub> and Eu-3d<sub>3/2</sub> lines are identical for both thin films. The location of the Eu-3d<sub>5/2</sub> line centred around 1134.6 eV corresponds well with Eu<sup>3+</sup> in Eu<sub>2</sub>O<sub>3</sub> <sup>1</sup>. In contrast, for metallic Eu a peak located around 1126 eV is typically reported <sup>2</sup>. Accordingly, in the europium doped ZnO thin films the Eu is most likely present as Eu<sup>3+</sup> like in Eu<sub>2</sub>O<sub>3</sub>. The closer evaluation of the Zn-2p lines yields information about the oxidation state of Zn in the ZnO:Eu thin films. For both thin films, the Zn-2p<sub>3/2</sub> line is located with a peak around 1021.7 eV, which corresponds well with Zn<sup>2+</sup> in ZnO (commonly reported between 1021.40 eV and 1022.50 eV) <sup>1</sup>.

In order to indicate the doping level in both thin films with increased Eu-doping, an exemplary quantification was conducted. The quantification of the europium doped ZnO thin films was performed based on the Zn-2p and Eu-3d lines (see **Figure S1b**) for the sample ZnO:Eu(4)

and ZnO:Eu(2). The Eu/Zn ratio in this XPS spectra quantification is roughly 1.11 and 0.67 respectively, which in turn corresponds to a Eu- doping surface concentration of about 53 % in case of ZnO:Eu(4) and 40 % in case of ZnO:Eu(2). Some details on sample SCS preparation can be found in other work too <sup>3-4</sup>.

### Supporting Information Text S2

After surface relaxation, the top and bottom surfaces were not equivalent and therefore we also needed to consider the unrelaxed surface energy ( $\gamma_u$ ) in order to calculate the final surface energy of the relaxed surface. The unrelaxed surface energy is defined as the surface energy before any surface optimization and is calculated as:

$$\gamma_u = \frac{E_{slab,u} - nE_{bulk}}{2A} \quad (1)$$

where  $E_{slab,u}$  is the energy of the unrelaxed slab,  $nE_{bulk}$  is the energy of an equal number of bulk atoms, and  $A$  is the surface area of one side of the slab. Using this value, it is then possible to calculate the relaxed surface energy ( $\gamma_r$ ) from the total energy of the relaxed slab.

The relaxed surface energy,  $\gamma_r$ , is given by:

$$\gamma_r = E_{slab,r} - nE_{bulk} - \gamma_u \quad (2)$$

where  $E_{slab,r}$  is the energy of the relaxed slab.

Bader charges were calculated using a developed by Henkelman and co-workers <sup>5-6</sup>.

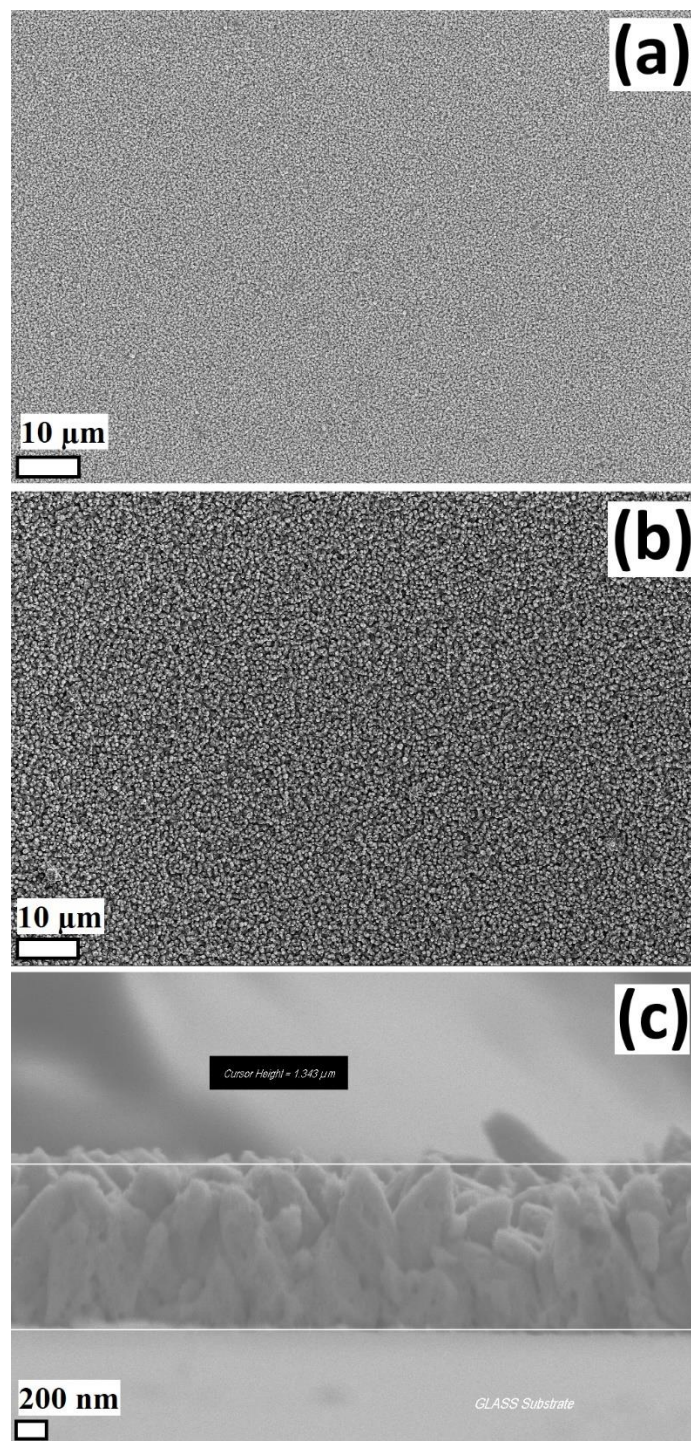

**Figure S1.** SEM images of ZnO:Eu films thermal annealed at: (a) 650 °C for 2 h, with about 0.1 at. % Eu; (b) 650 °C for 2 h with about 0.15 at% Eu and Pd-functionalized; (c) 650 °C for 2 h with about 0.2 at. % Eu in sectional-view showing a thickness of about 1.35  $\mu\text{m}$ .

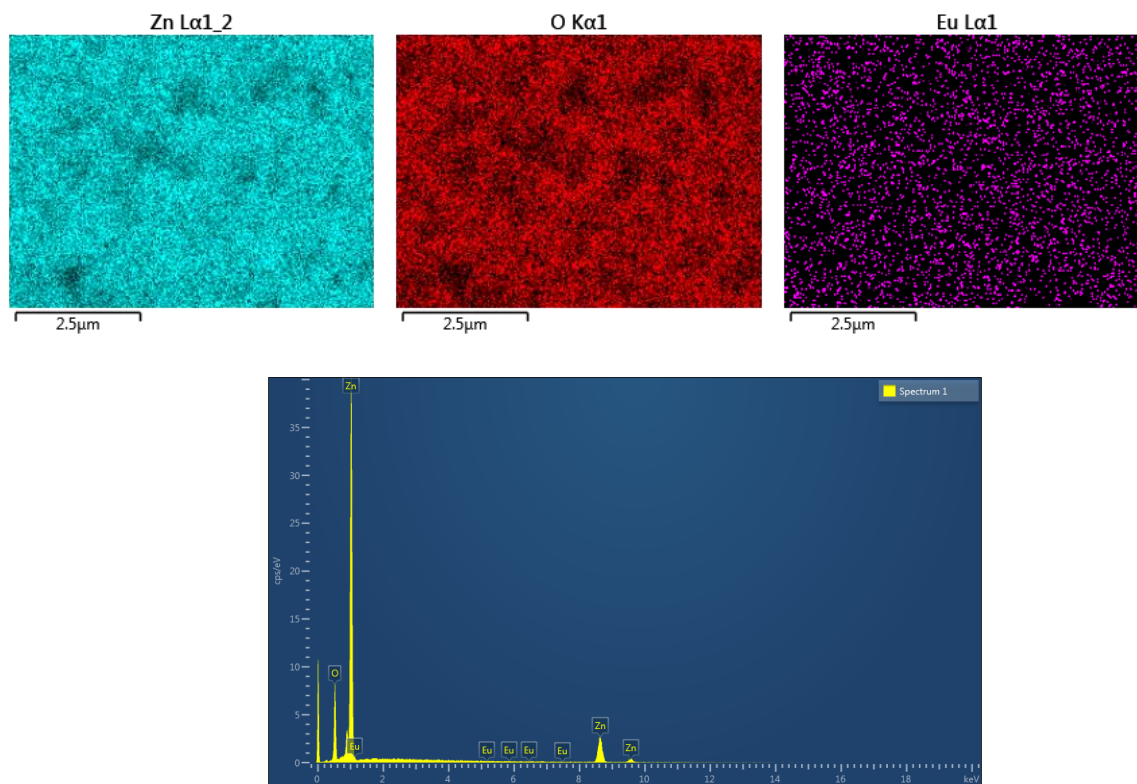

Sample ZnO:Eu<sub>2</sub>T<sub>650</sub>C

| Result Type | Atomic % |
|-------------|----------|
|-------------|----------|

| Spectrum Label | Spectrum 1 |
|----------------|------------|
| O              | 49.30      |
| Zn             | 50.60      |
| Eu             | 0.10       |
| Total          | 100.00     |

| Statistics         | O     | Zn    | Eu   |
|--------------------|-------|-------|------|
| Max                | 49.30 | 50.60 | 0.10 |
| Min                | 49.30 | 50.60 | 0.10 |
| Average            | 49.30 | 50.60 | 0.10 |
| Standard Deviation | 0.00  | 0.00  | 0.00 |

**Figure S2.** Compositional images taken by EDX elemental mapping at the microstructural level of columnar ZnO:Eu<sub>2</sub> films thermal annealed at 650 °C for 2 h, with about 0.1 at. % Eu and EDX spectra below, respectively.

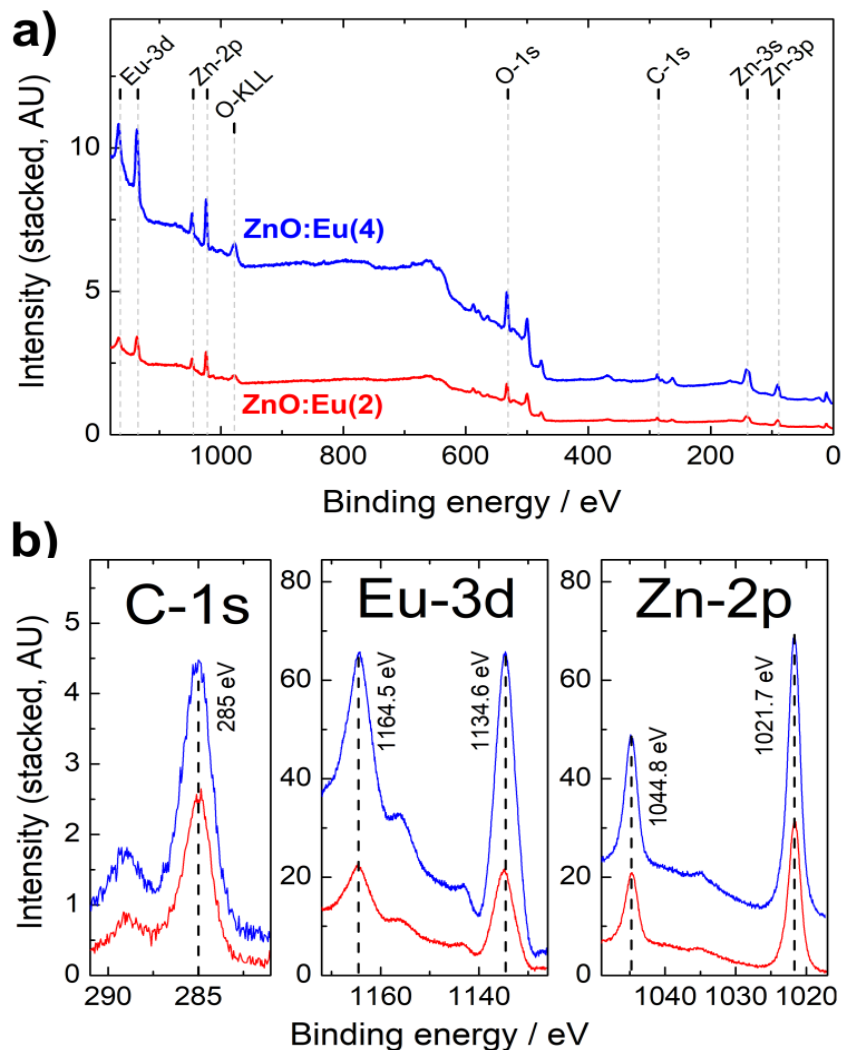

**Figure S3.** XPS spectra of ZnO:Eu columnar thin films with different doping concentrations. The overview spectra (a) reveal the presence of Eu, Zn, O and C for both ZnO:Eu thin films. The high resolution spectra (b) of the C-1s line, Eu-3d lines and Zn-2p lines indicate that there is no difference in peak positions between both samples. The peak location of Eu-3d and Zn-2p lines correspond to  $\text{Eu}^{3+}$  in  $\text{Eu}_2\text{O}_3$  and  $\text{Zn}^{2+}$  in ZnO respectively.



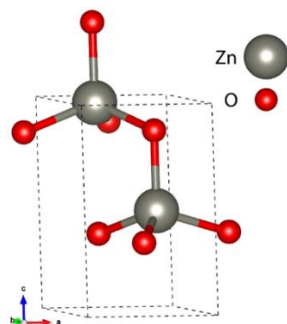

**Figure S4.** Bulk structure of ZnO.

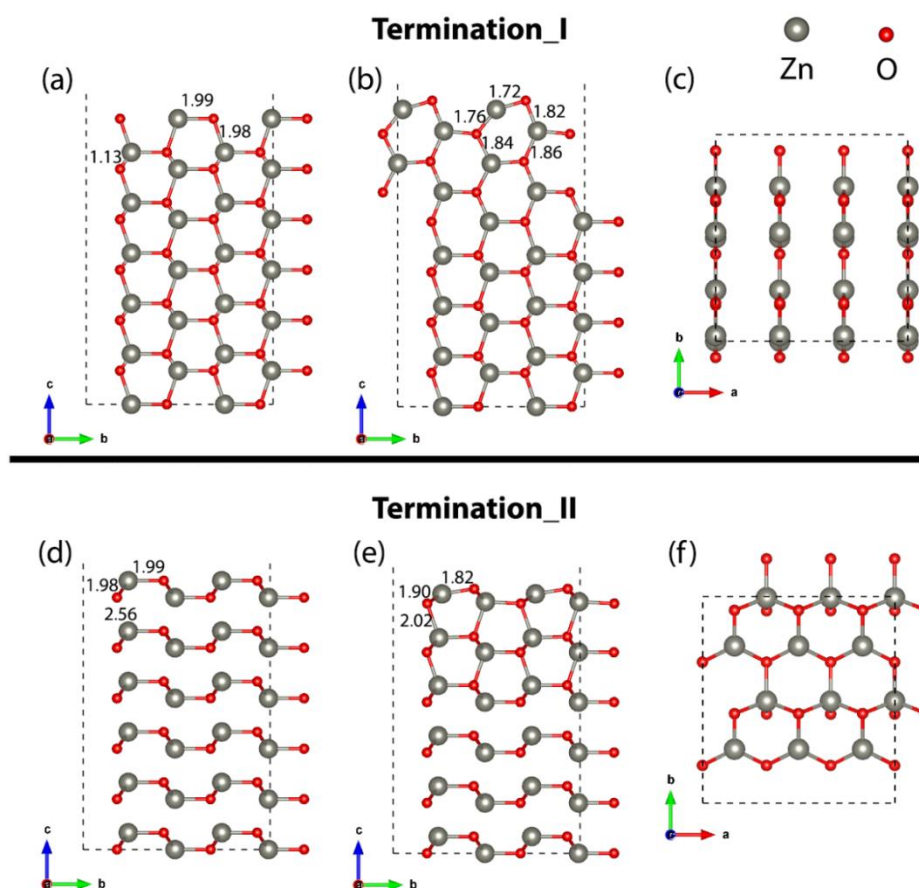

**Figure S5.** Two possible ZnO ( $1\ 0\ \bar{1}\ 0$ ) surface terminations. (a, b, and c): Termination\_I (side view of un-relaxed structure, side view of relaxed structure, and top view of relaxed structure. (d, e, and f): Termination\_II (side view of un-relaxed structure, side view of relaxed structure, and top view of relaxed structure.

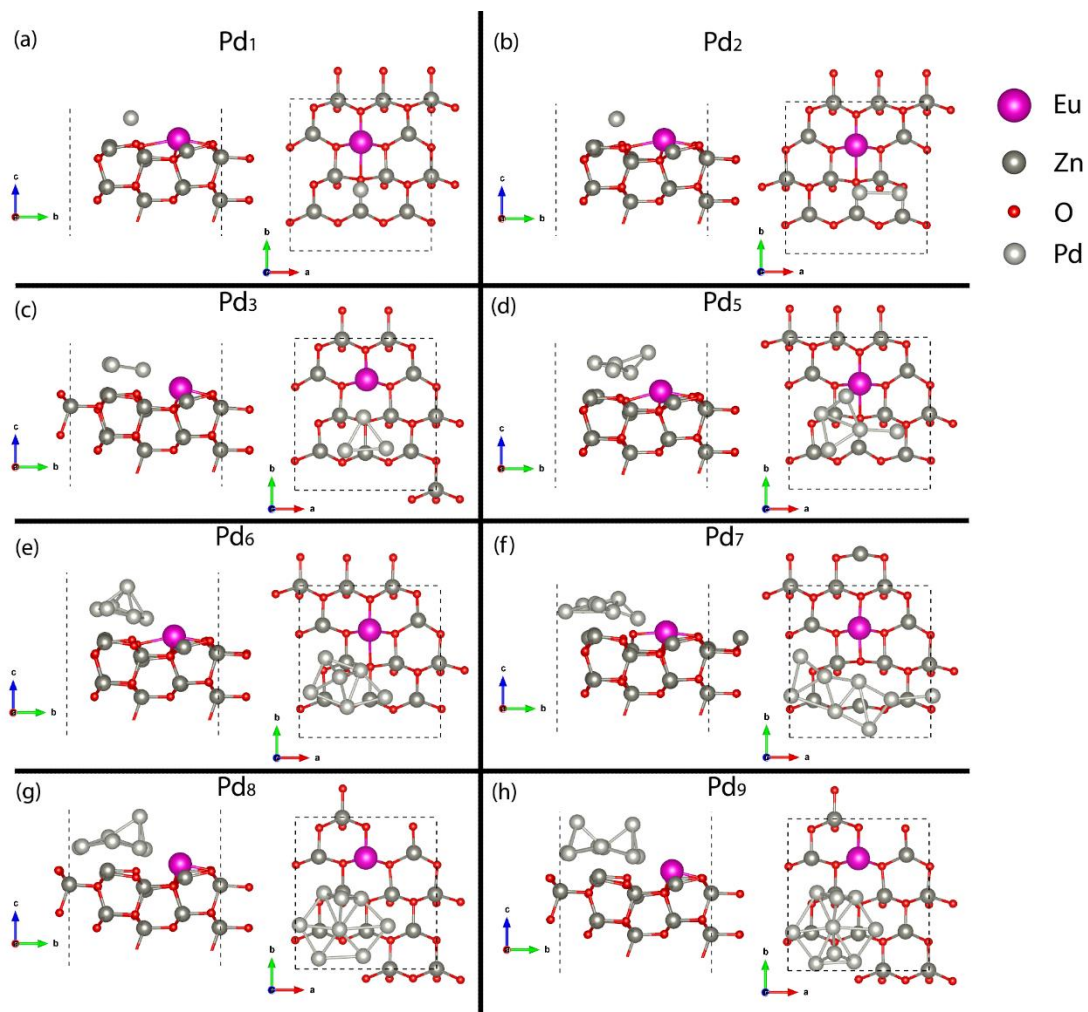

**Figure S6.** Top and side views of  $\text{Pd}_n$  ( $n=1$  to  $9$ ) clusters adsorbed on  $\text{Eu:ZnO}(10\bar{1}0)$  surface:

(a, b, c, d):  $\text{Pd}_1$ ,  $\text{Pd}_2$ ,  $\text{Pd}_3$  and  $\text{Pd}_5$  cluster over  $\text{Eu:ZnO}(10\bar{1}0)$  surface. (e, f, g, h):  $\text{Pd}_5$ ,  $\text{Pd}_6$ ,  $\text{Pd}_7$ ,  $\text{Pd}_8$ , and  $\text{Pd}_9$  cluster over  $\text{Eu:ZnO}(10\bar{1}0)$  surface.



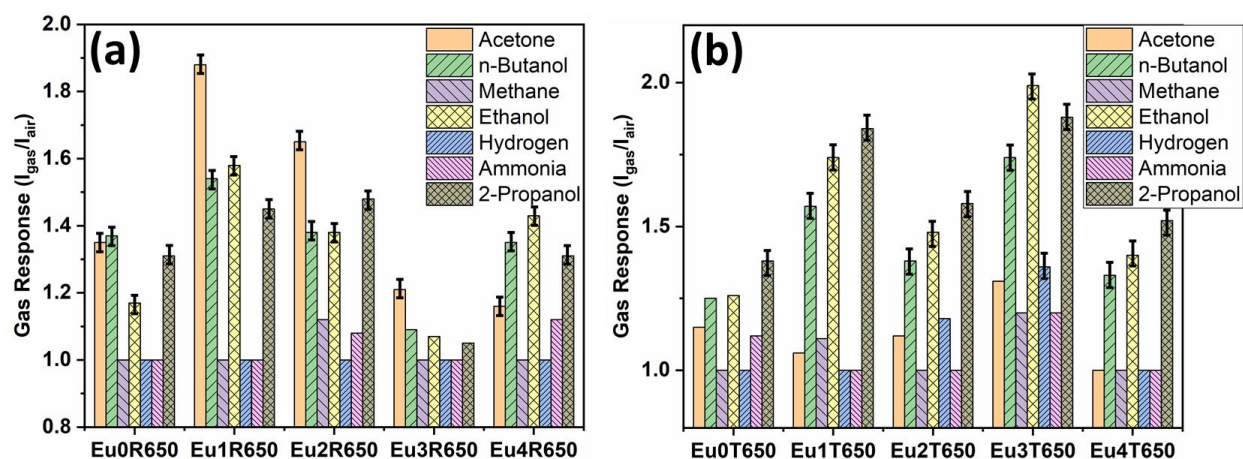

**Figure S7.** The gas response of pristine ZnO:Eu columnar films with different content of Eu (0.00 at. % Eu – Eu0; ~0.05 at. % Eu – Eu1; ~0.10 at. % Eu – Eu2; ~0.15 at. % Eu – Eu3 and ~0.20 at. % Eu – Eu4) to 100 ppm of different gases at operating temperature of 350 °C: (a) samples RTA-treated at 650 °C for 60 s; and (b) samples TA-treated at 650 °C for 2 h.

**Figure S7a** presents the gas response of pristine ZnO:Eu columnar films RTA-treated at 650 °C for 60 s and with different content of Eu (0.00 at. % Eu noted as Eu0; ~0.05 at. % Eu noted as Eu1; ~0.10 at. % Eu noted as Eu2; ~0.15 at. % Eu noted as Eu3 and ~0.20 at. % Eu noted as Eu4) to 100 ppm of different gases at operating temperature of 350 °C. **Figure S7b** presents the gas response of sample sets with different content of Eu as noted above, but TA-treated at 650 °C for 2 h. It can be clearly seen that at higher operating temperature (350 °C) both types of annealed sample sets do not show selectivity and proves that sensor function is perfect at 350 °C.

**Figure S8** shows dynamic response of Pd-functionalized ZnO:Eu columnar films for 100, 200 and 300 ppm of hydrogen measured at room temperature. It clearly proves that by Eu-doping of columnar ZnO films followed by Pd-functionalization it is possible to decrease the operating temperature of the sensing material versus H<sub>2</sub> gas.

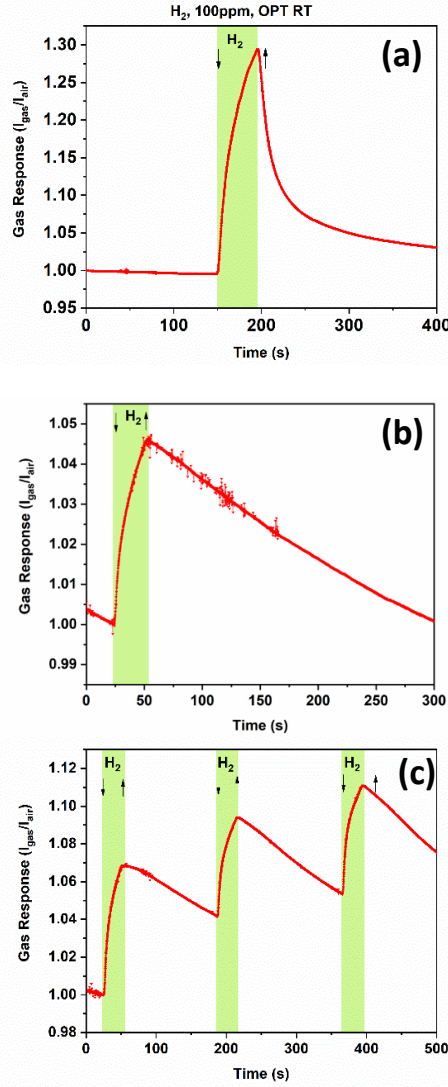

**Figure S8.** Dynamic response of Pd-functionalized ZnO:Eu columnar films for: (a) 100 ppm of hydrogen measured at room temperature; (b) 200 ppm of hydrogen measured at room temperature, sample with 0.05 at. % Eu subjected to TA550, sample set Eu1T550; (c) 300 ppm of hydrogen measured at room temperature, sample with 0.1 at. % Eu after TA550.

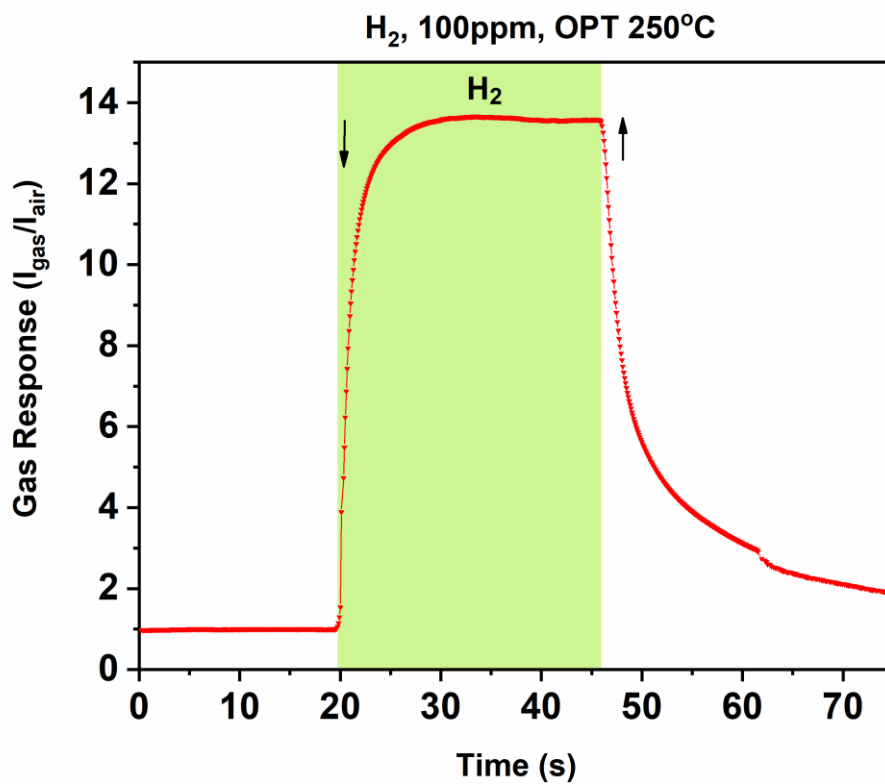

**Figure S9.** Dynamic response of ZnO with about 0.05 at. % Eu – Eu1T650; Pd-functionalized columnar films for 100 ppm of hydrogen gas at operating temperature of 250 °C.

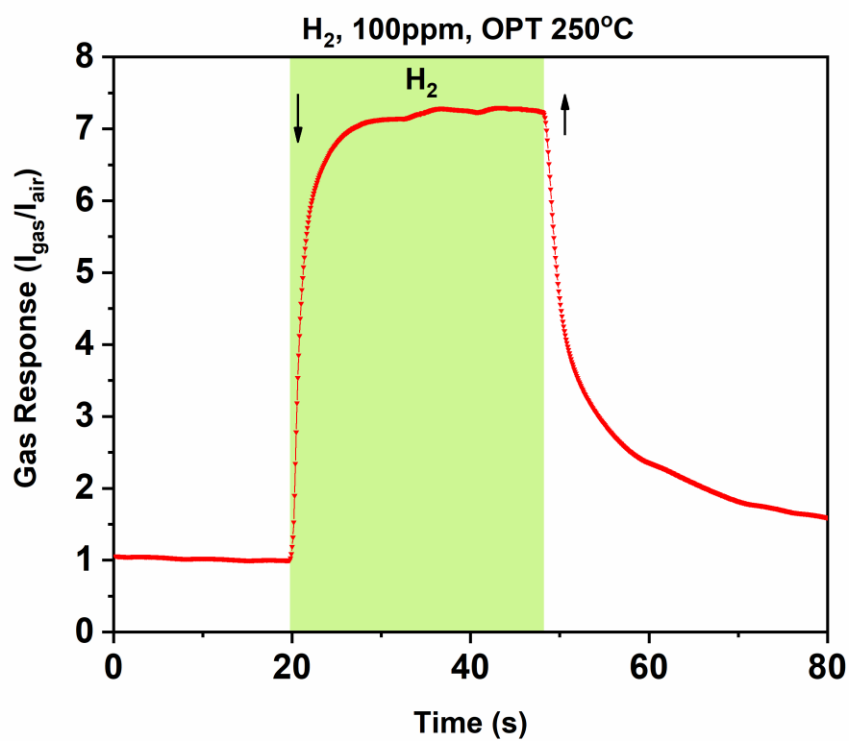

**Figure S10.** Dynamic response of ZnO:Eu with about 0.2 at. % Eu –Eu4T650; Pd-functionalized columnar films for 100 ppm of hydrogen gas at operating temperature of 250 °C.

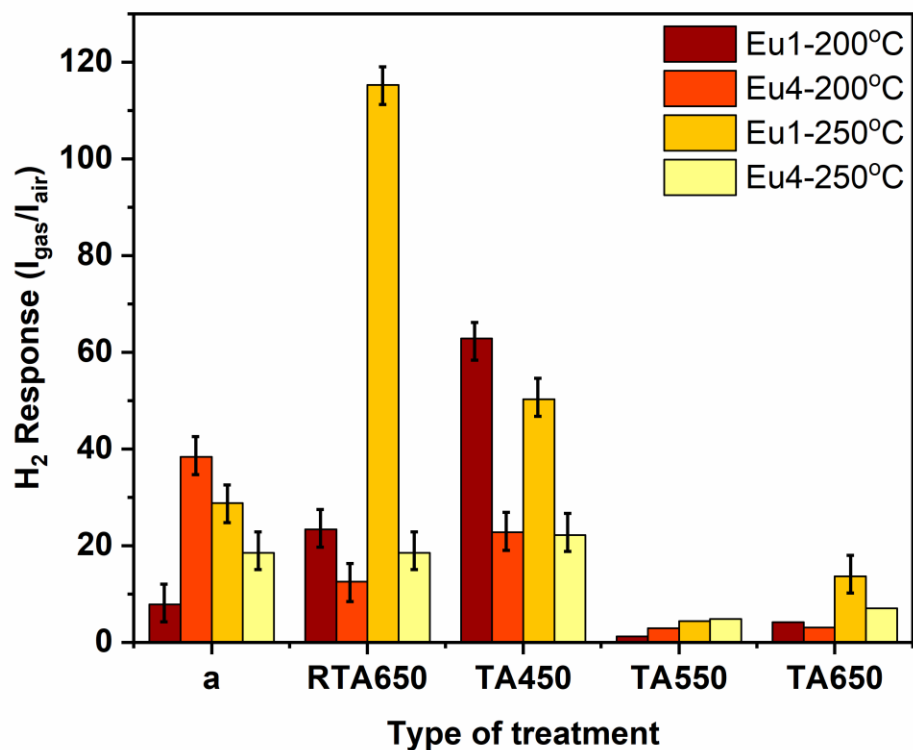

**Figure S11.** Response of Pd-functionalized ZnO:Eu columnar films to 100 ppm hydrogen versus treatment type (TA or RTA), noted as Eu1( ~0.05 at. % Eu), Eu4(~0.2 at. % Eu) at operating temperatures of 200 °C and 250 °C. Type of treatment: **a** - as grown; RTA650-rapid thermal annealing; TA450,TA550,TA650 - thermal annealing at 450, 550, 650 °C, respectively.

**Table S1.** Calculated adsorption energies ( $E_{\text{ads}}$ ) (in eV), shortest Pd-Zn ( $d_{\text{Zn}}^{\text{s}}$ ) and Pd-O ( $d_{\text{O}}^{\text{s}}$ ) distances (in Å) of the  $\text{Pd}_n$  cluster with the first atomic layer of the ZnO slab for different  $\text{Pd}_n/\text{ZnO}$  ( $10\bar{1}0$ ) systems.

|                            | $\text{Pd}_1$ | $\text{Pd}_2$ | $\text{Pd}_3$ | $\text{Pd}_5$ | $\text{Pd}_6$ | $\text{Pd}_7$ | $\text{Pd}_8$ | $\text{Pd}_9$ |
|----------------------------|---------------|---------------|---------------|---------------|---------------|---------------|---------------|---------------|
| $E_{\text{ads}}$           | -1.65         | -2.89         | -5.35         | -6.97         | -7.05         | -6.98         | -7.83         | -8.15         |
| $d_{\text{Zn}}^{\text{s}}$ | 2.533         | 2.542         | 2.657         | 2.543         | 2.627         | 2.641         | 2.679         | 2.635         |
| $d_{\text{O}}^{\text{s}}$  | 2.149         | 2.168         | 2.218         | 2.101         | 2.109         | 2.101         | 2.063         | 2.061         |



## References

- (1) Rumble, J. R.; Bickham, D. M.; Powell, C. J. The NIST X- ray photoelectron spectroscopy database. *Surf Interface Anal* **1992**, *19*, 241–246.
- (2) Moulder, J. F.; Stickle, W. F.; Sobol, P. E.; Bomben, K. D. Handbook of Photoelectron Spectroscopy. *Phys Electron Inc, Eden Prairie, Minnesota* **1992**. doi:10.1002/sia.740030412.
- (3) Lupan, O.; Pauporté, T.; Viana, B.; Aschehoug, P.; Ahmadi, M.; Cuenya, B. R.; Rudzevich, Y.; Lin, Y.; Chow, L. Eu-Doped ZnO Nanowire Arrays Grown by Electrodeposition. *Appl. Surf. Sci.* **2013**, *282*, 782–788.
- (4) Lupan, O.; Pauporté, T.; Tiginyanu, I. M.; Ursaki, V. V.; Şontea, V.; Ono, L. K.; Cuenya, B. R.; Chow, L. Comparative Study of Hydrothermal Treatment and Thermal Annealing Effects on the Properties of Electrodeposited Micro-Columnar ZnO Thin Films. *Thin Solid Films* **2011**, *519* (22), 7738–7749.
- (5) Singh, V.; Dhall, S.; Kaushal, A.; Mehta, B. R. Room Temperature Response and Enhanced Hydrogen Sensing in Size Selected Pd-C Core-Shell Nanoparticles: Role of Carbon Shell and Pd-C Interface. *Int. J. Hydrogen Energy* **2018**, *43* (2), 1025–1033.
- (6) Bader, R. F.W. Atoms in Molecules: A Quantum Theory; Oxford University Press: London, 1994.
